# Supplementary material for: Low-frequency ionic-electronic coupling for energy-efficient noise-resilient wireless bioelectronics
Source: Research Square preprint supplement (doi:10.21203/rs.3.rs-7666288/v1), 2025-11-12

Supplementary Information

**Low-frequency ionic-electronic coupling for energy-efficient noise-resilient wireless bioelectronics**

Ji Hong Kim1†, Haerim Kim2†,Jaewon Rhee2, Joo Sung Kim1‡, Hanbin Choi1, Won Hyuk Choi1, Seungyoung Ahn2*, and Do Hwan Kim1,3,4*

*1Department of Chemical Engineering, Hanyang University, Seoul 04763, Republic of Korea.*

*2Cho Chun Shik Graduate School of Mobility, Korea Advanced Institute of Science and Technology, Daejeon 34051, Republic of Korea.*

*3Institute of Nano Science and Technology, Hanyang University, Seoul 04763, Republic of Korea.*

*4Clean-Energy Research Institute, Hanyang University, Seoul 04763, Republic of Korea.*

†These authors contributed equally to this work.

‡Current address: Thin-Film Device Laboratory, RIKEN, 2-1 Hirosawa, Wako, Saitama 351-0198, Japan.

*Corresponding authors’ email: sahn@kaist.ac.kr (S.A.), dhkim76@hanyang.ac.kr (D.H.K.)

**This PDF file includes:**

Supplementary Figures 1 to 20

Supplementary Table 1 to 3

Supplementary Figures


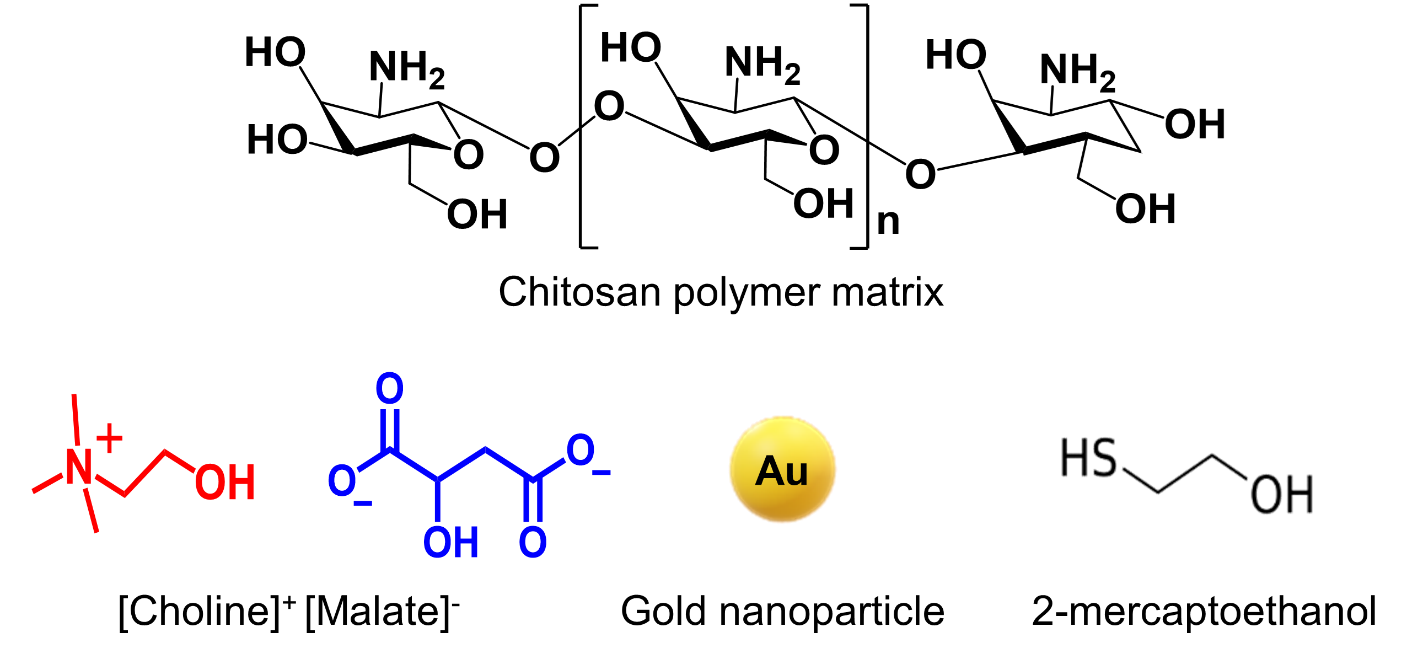


**Supplementary Fig. 1 |** Molecular structures of thewireless low-frequency electrochemical sensor


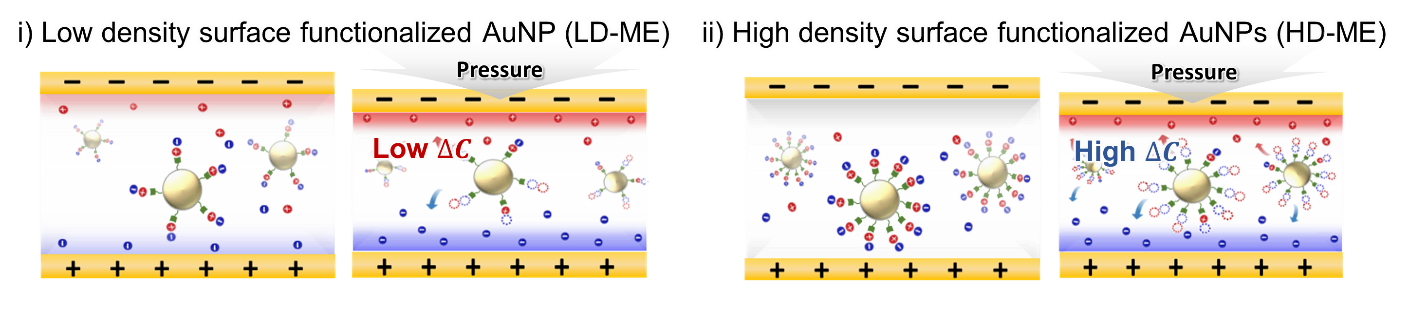


**Supplementary Fig. 2 |** Comparison of capacitance changeinduced by pressure in low(left) and high (right) functionalization surfaces of gold nanoparticles. The surface with high functionalization density shows a significantly higher capacitance change (ΔC) compared to the low functionalization surface, resulting in enhanced sensitivity.


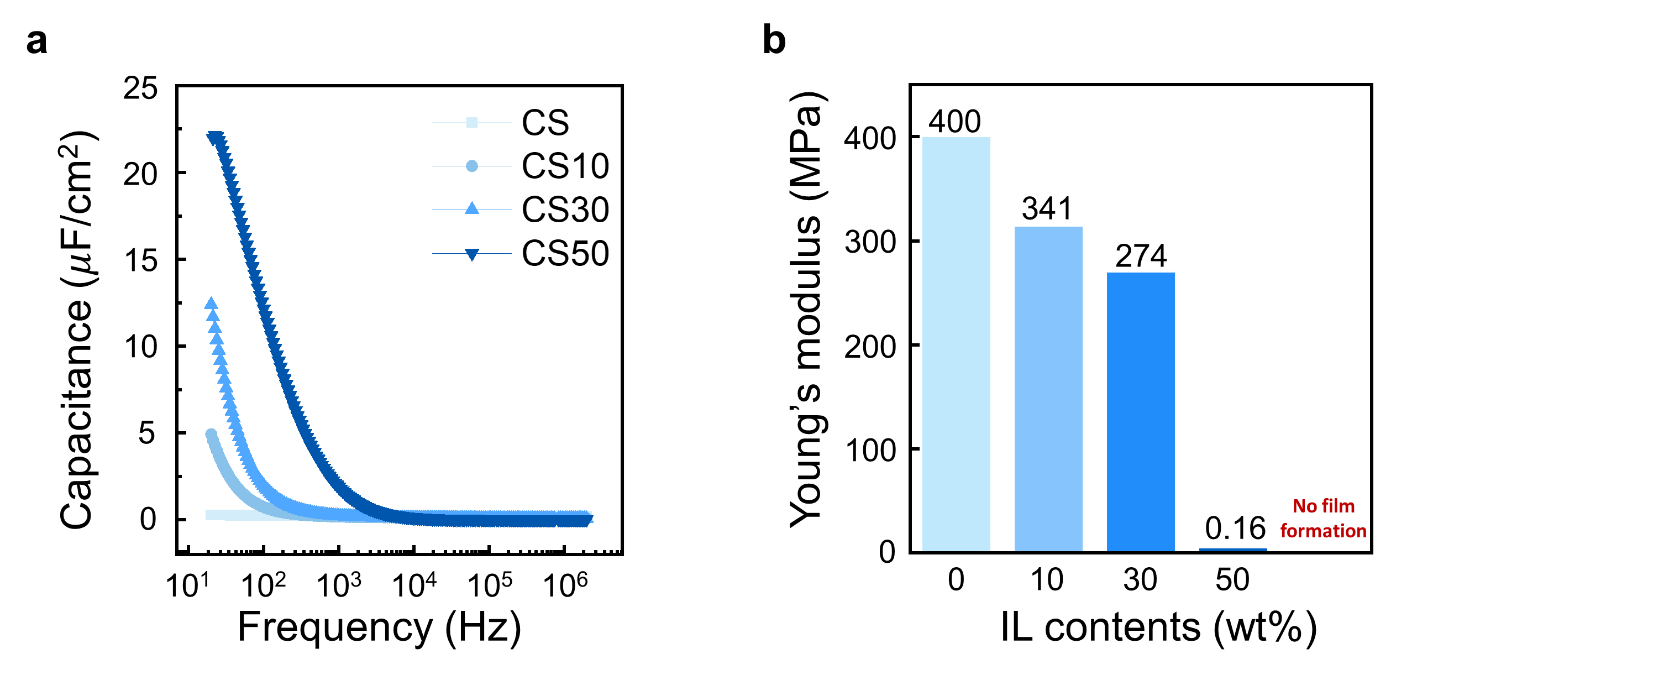


**Supplementary Fig. 3 | Electrical and mechanical properties of chitosan-based ion gel a,** Frequency-dependent capacitance of chitosan pristine ion gel with various ionic liquid content (0-50wt%). **b,** Young’s modulus of chitosan pristine ion gel with various ionic liquid content (0-50wt%).

**
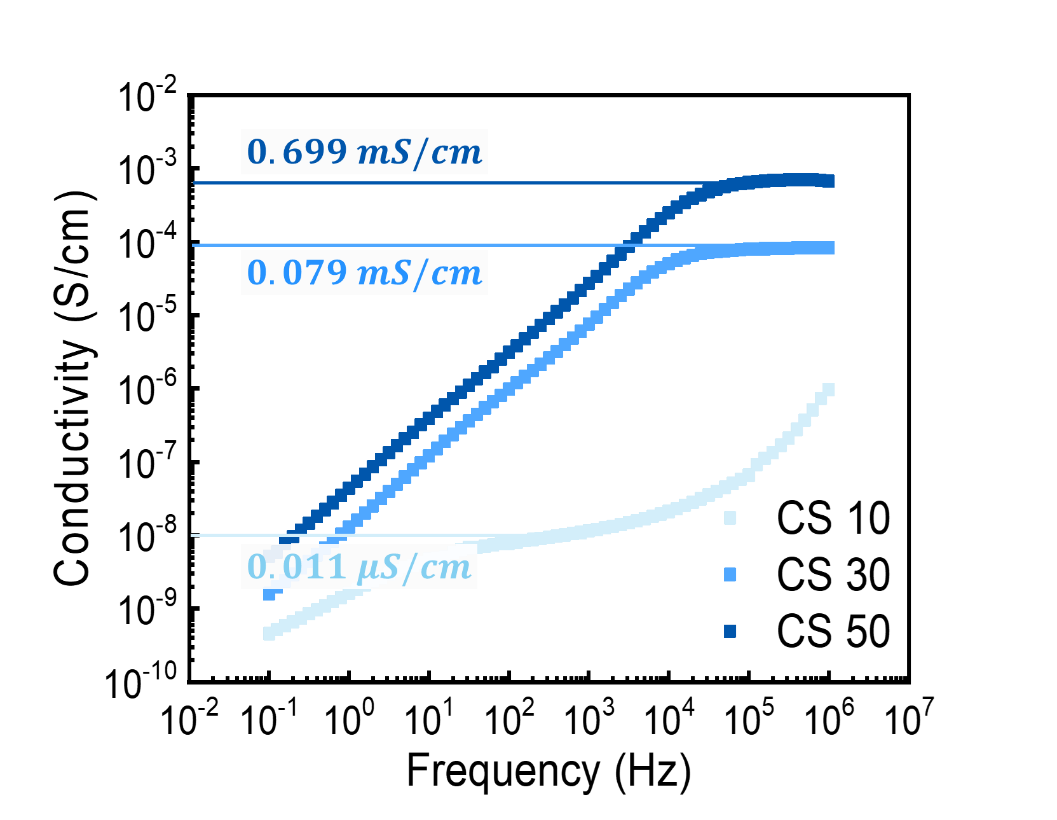
**

**Supplementary Fig. 4** | Ionic conductivity from bode plotsfor pristine ion gel with various ion contents. As the ionic liquid content increases from 10 wt% to 50 wt%, the ionic conductivity increases dramatically.

**
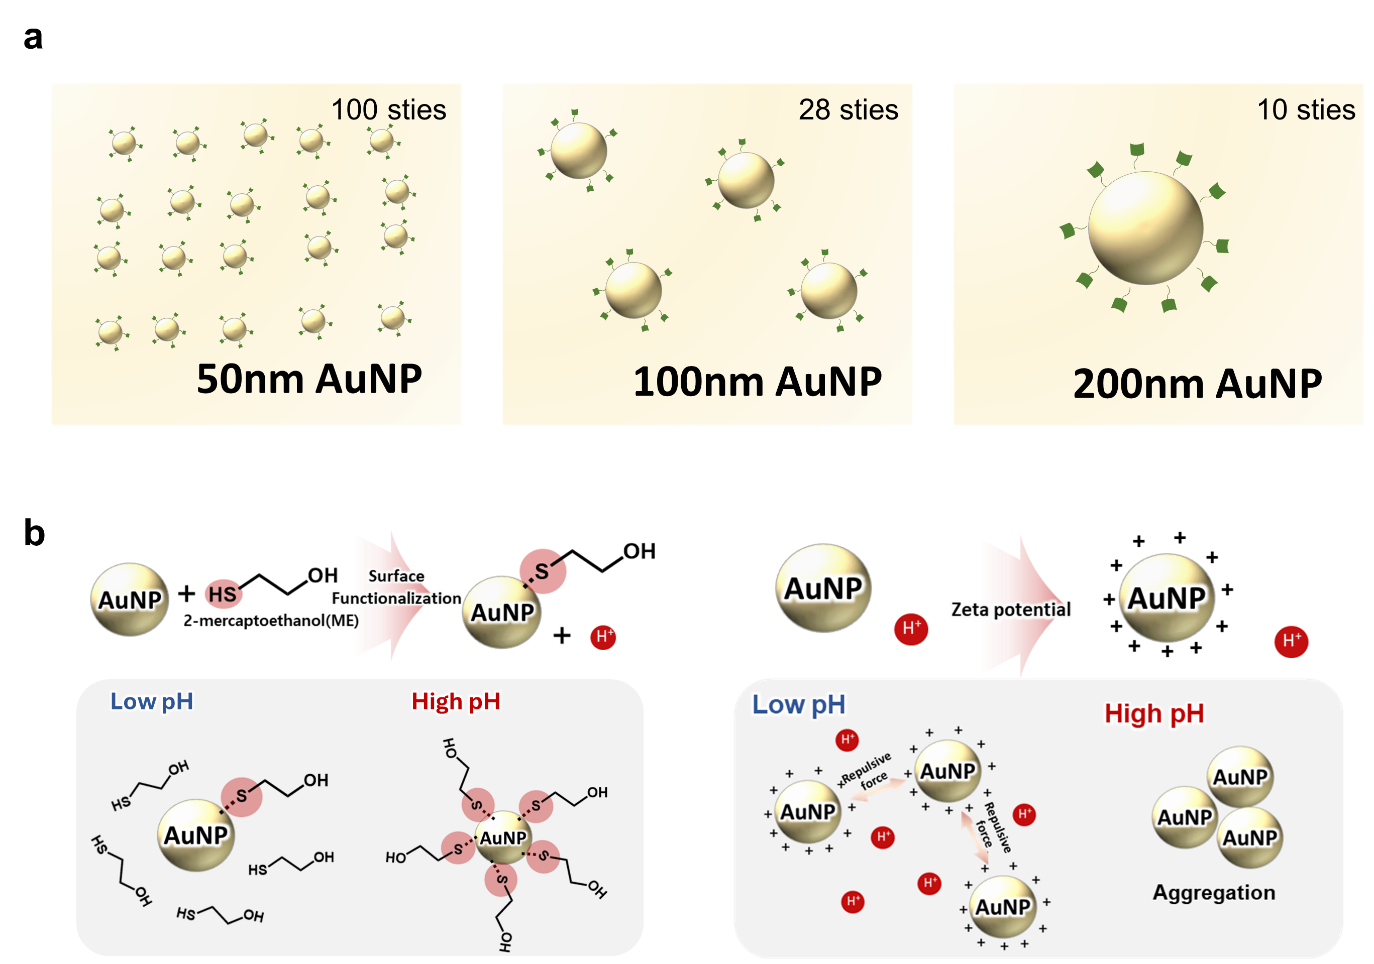
**

**Supplementary Fig. 5 |** Differences of surface functionalized density by (a) size of gold nanoparticle, and (b) synthetic pH condition.

**
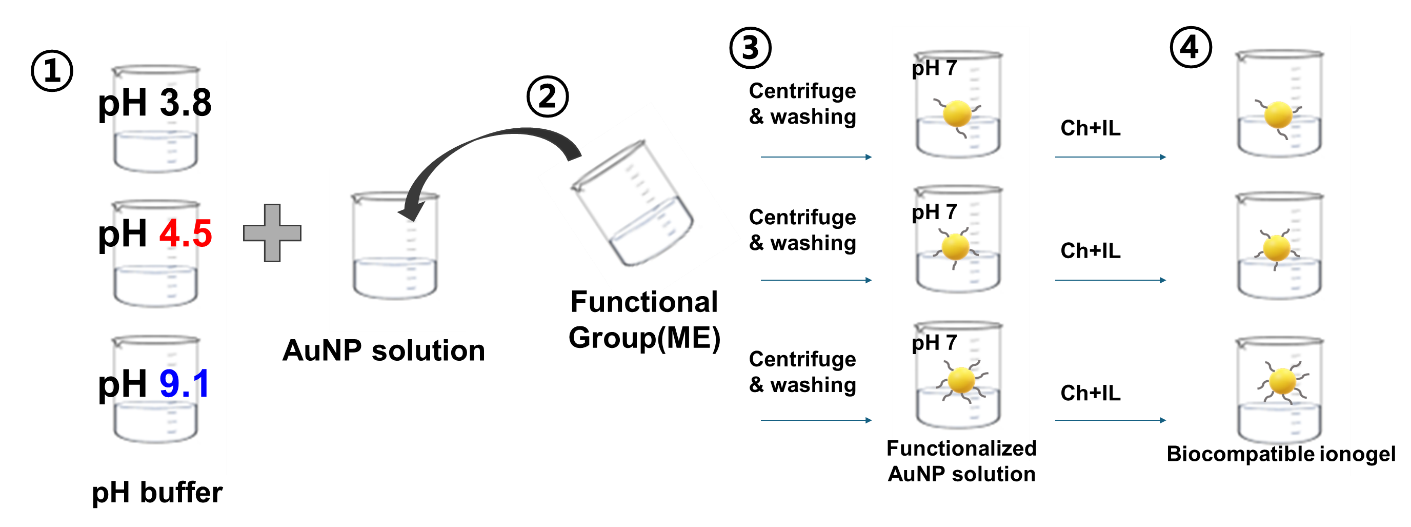
**

**Supplementary Fig. 6 | Synthesis of functionalized gold nanoparticles.** Schematics illustrates the synthesis process of functionalized gold nanoparticles.


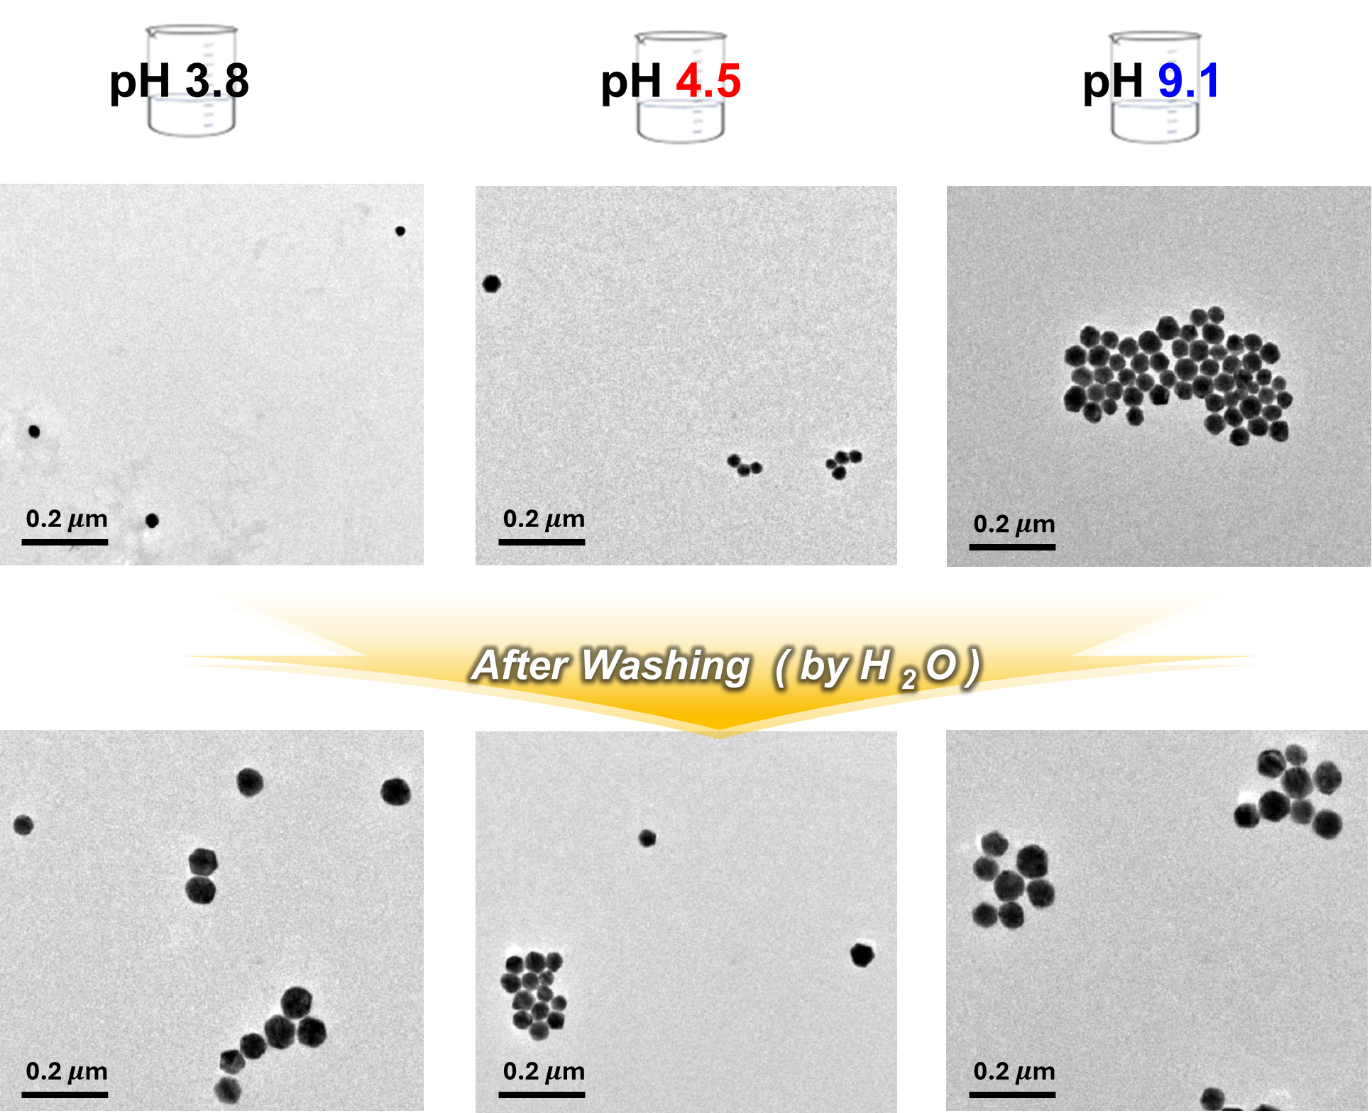


**Supplementary Fig. 7 |** TEM images of gold nanoparticles under different conditionsdisplaying the aggregations of gold nanoparticles by varying pH conditions.


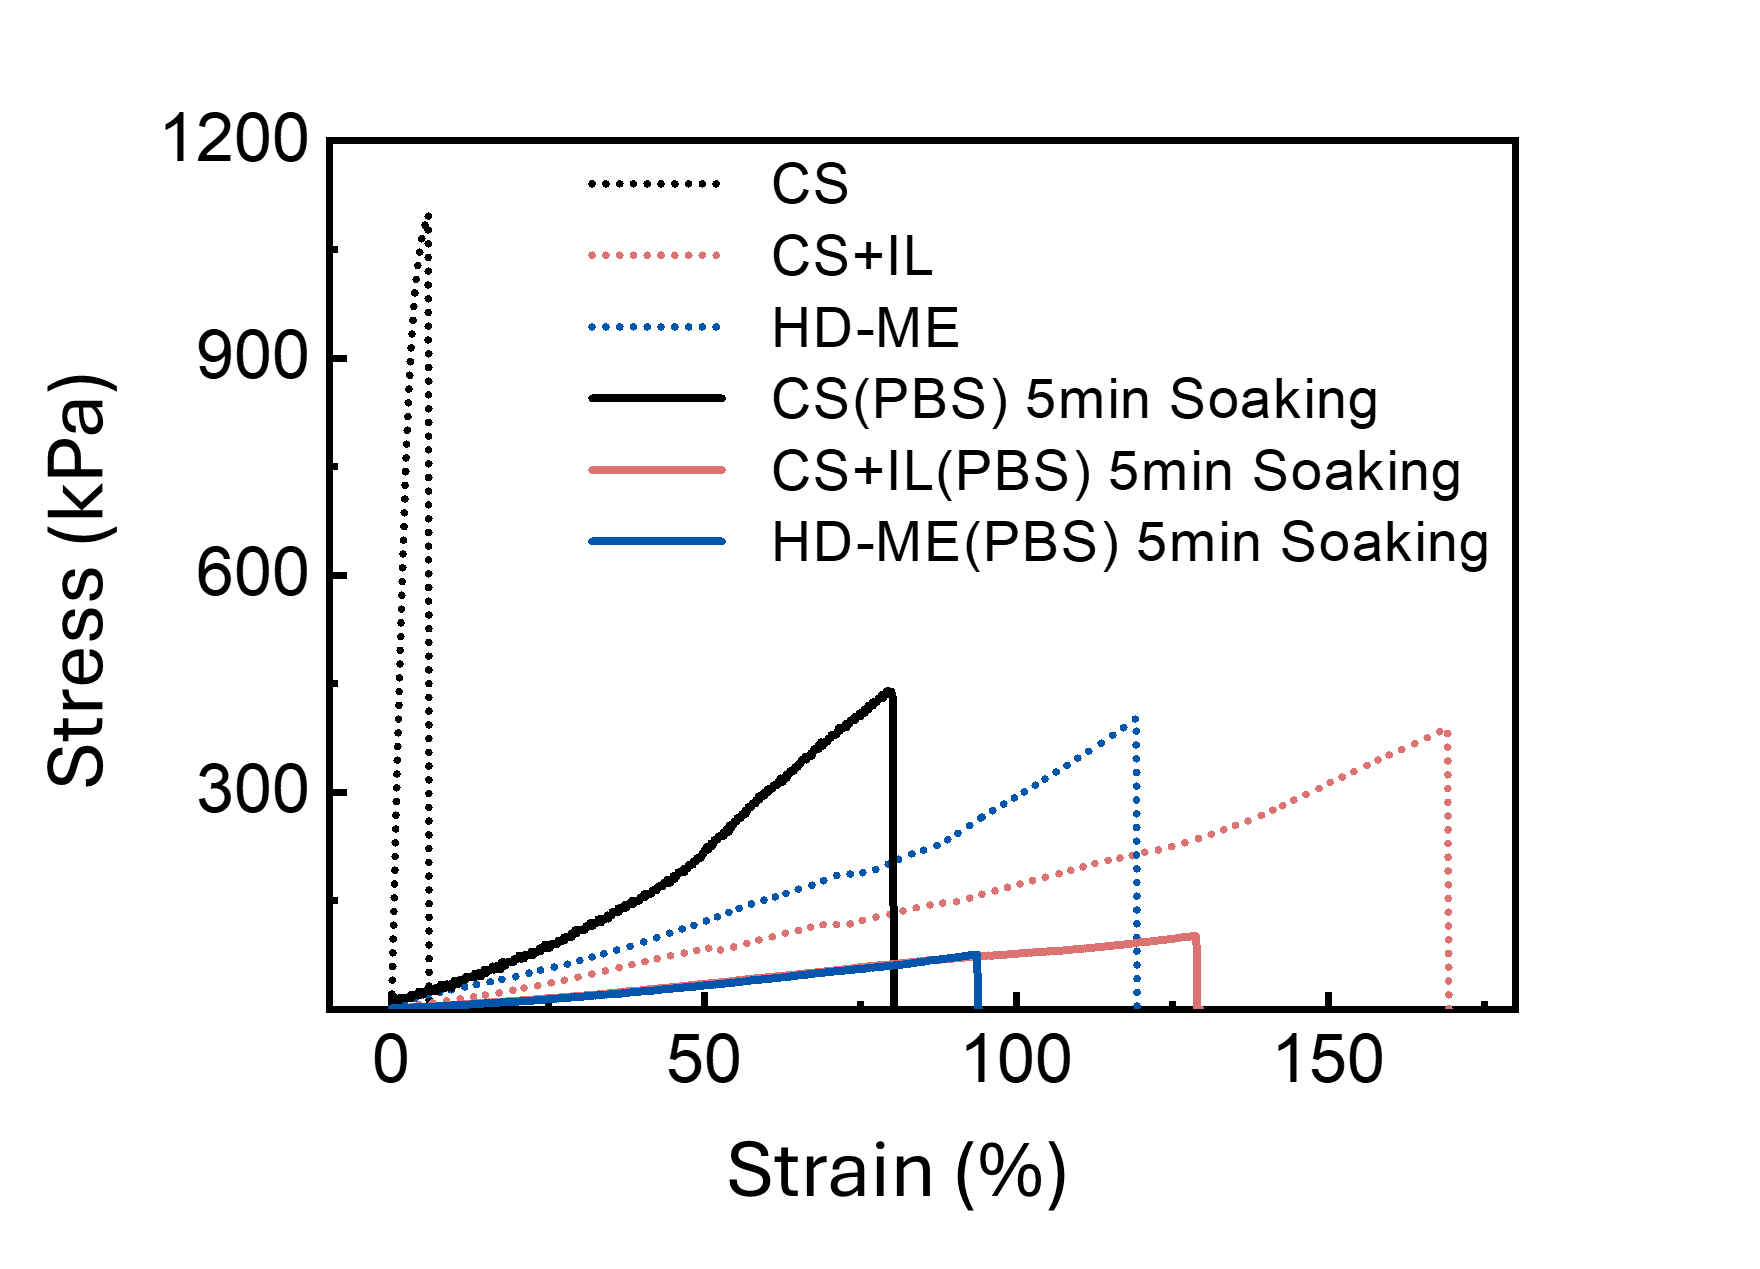


**Supplementary Fig. 8 |** Stress–strain curves of pristine chitosan(CS) gel, chitosan with ionic liquid(CS+IL) ion gel, and high-density surface functionalized gold nanoparticle(HD-ME) ion gel comparing before and after soaking in PBS buffer.


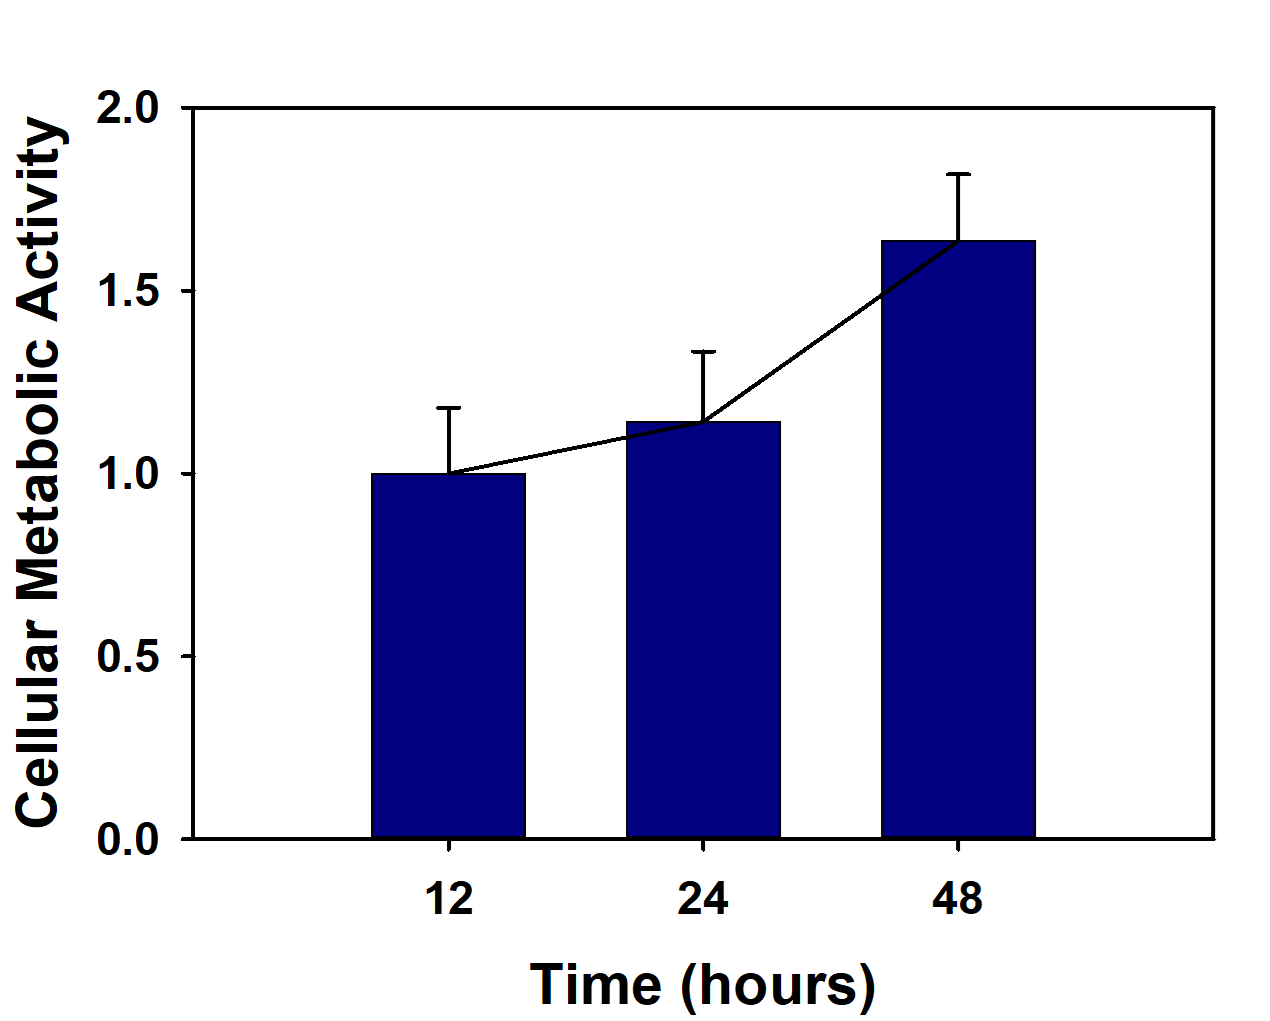


**Supplementary Fig. 9 |** Cellular metabolic activity of HD-ME ion gel over time (12-48 hours).


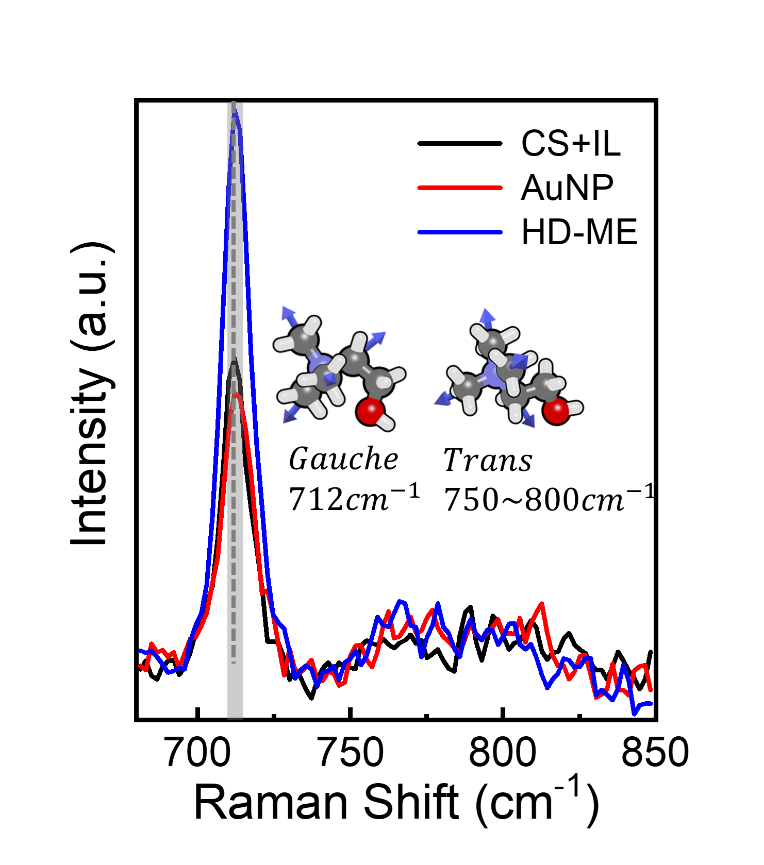


**Supplementary Fig. 10 |** The Raman spectra in the spectral range 680–850 cm−1 corresponding to choline cation conformation in various ion gel.


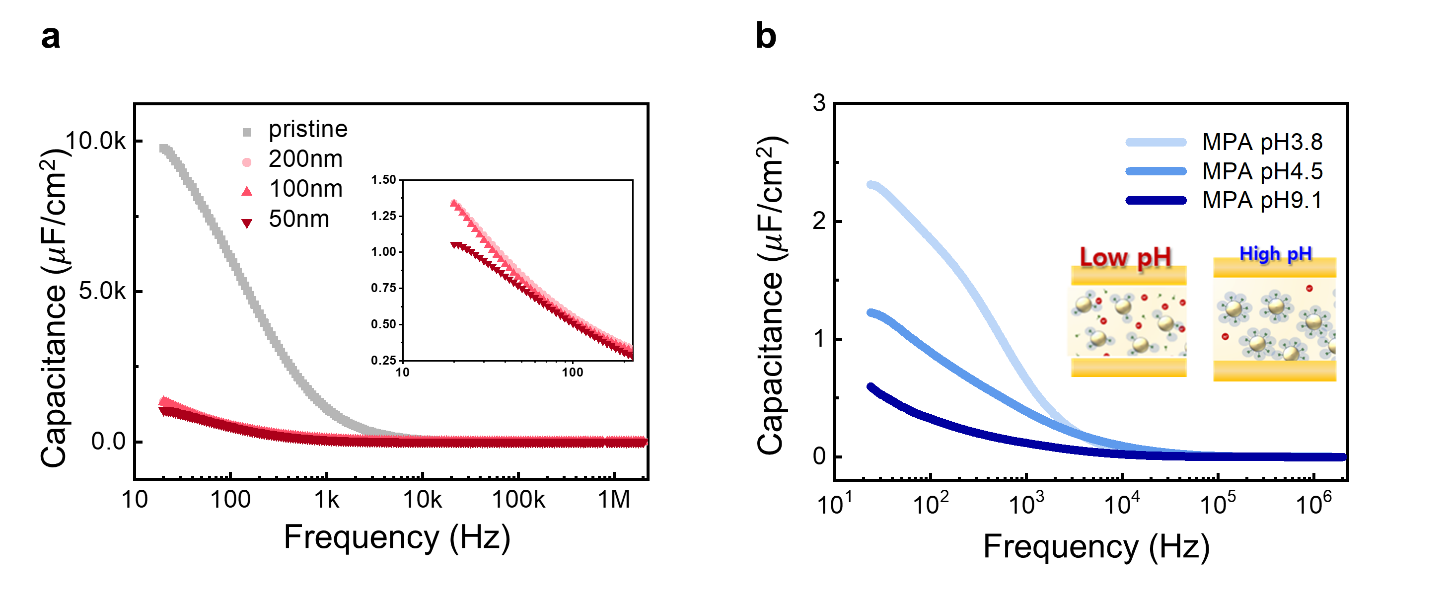


**Supplementary Fig. 11 | Comparison of capacitance change as a function of frequency.** The capacitance change was analyzed by different functionalized condition (**a**) gold nanoparticle size (50-200nm) and (**b**) synthesizing pH condition (pH 3.8-pH9.1) The capacitance change to frequency decrease with higher surface functionalization density.


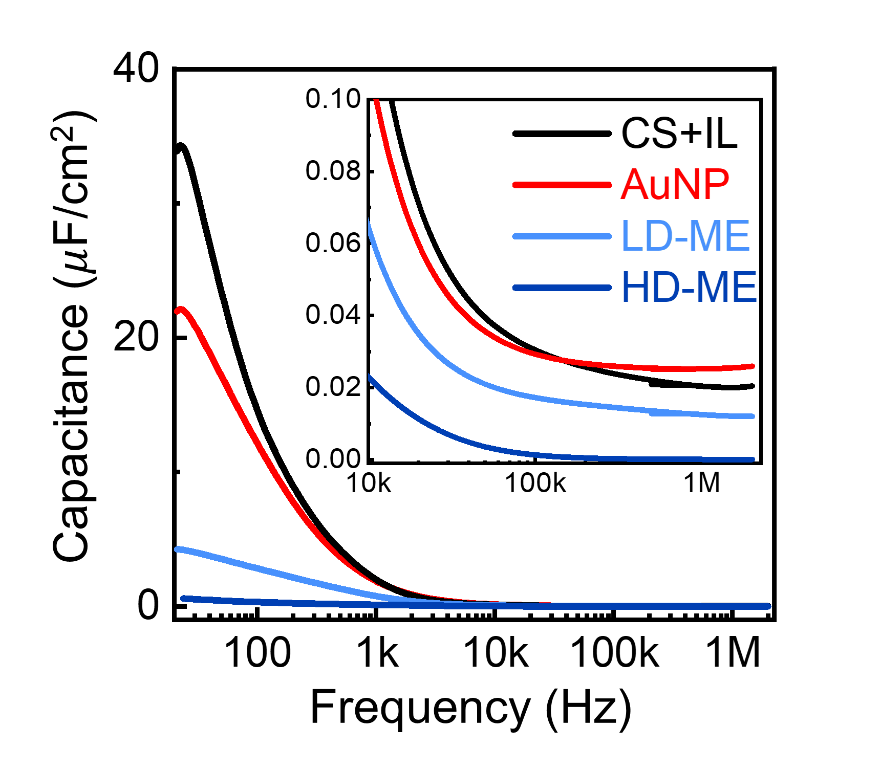


**Supplementary Fig. 12 | Frequency vs. capacitance plots of various material-based ion gels.** The strong ion-trapping effect of gold nanoparticles results in lower capacitance across various frequency ranges (20-2MHz).


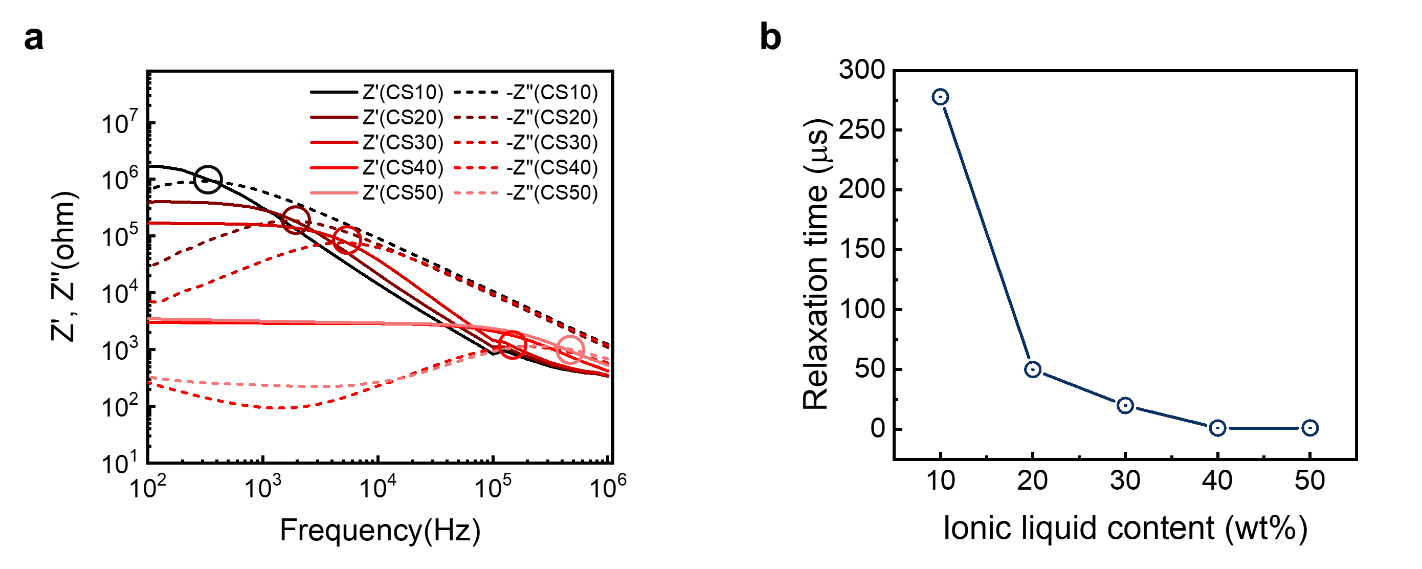


**Supplementary Fig. 13 | Ion dynamics of chitosan-based ion gel. a,** Frequency-dependent impedance spectra of the pristine ion gel, showing real (solid line) and imaginary (dashed line) components at varying ionic concentrations. **b,** Relaxation time values corresponding to different ionic liquid contents, derived from the impedance spectra.


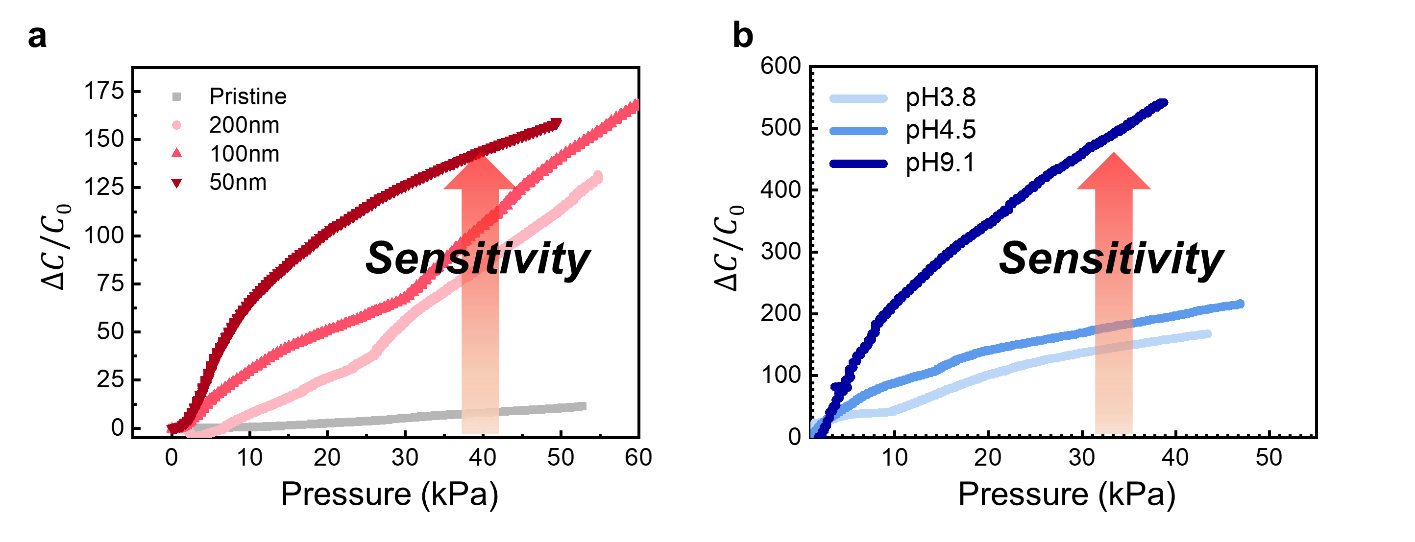


**Supplementary Fig. 14 | Comparison of capacitance change as a function of applied pressure.** The capacitance change was analyzed by different functionalized condition (**a**) gold nanoparticle size (50-200nm) and (**b**) synthesizing pH condition (pH 3.8-pH 9.1). The sensitivity of capacitance changes to pressure increases with higher surface functionalization density.


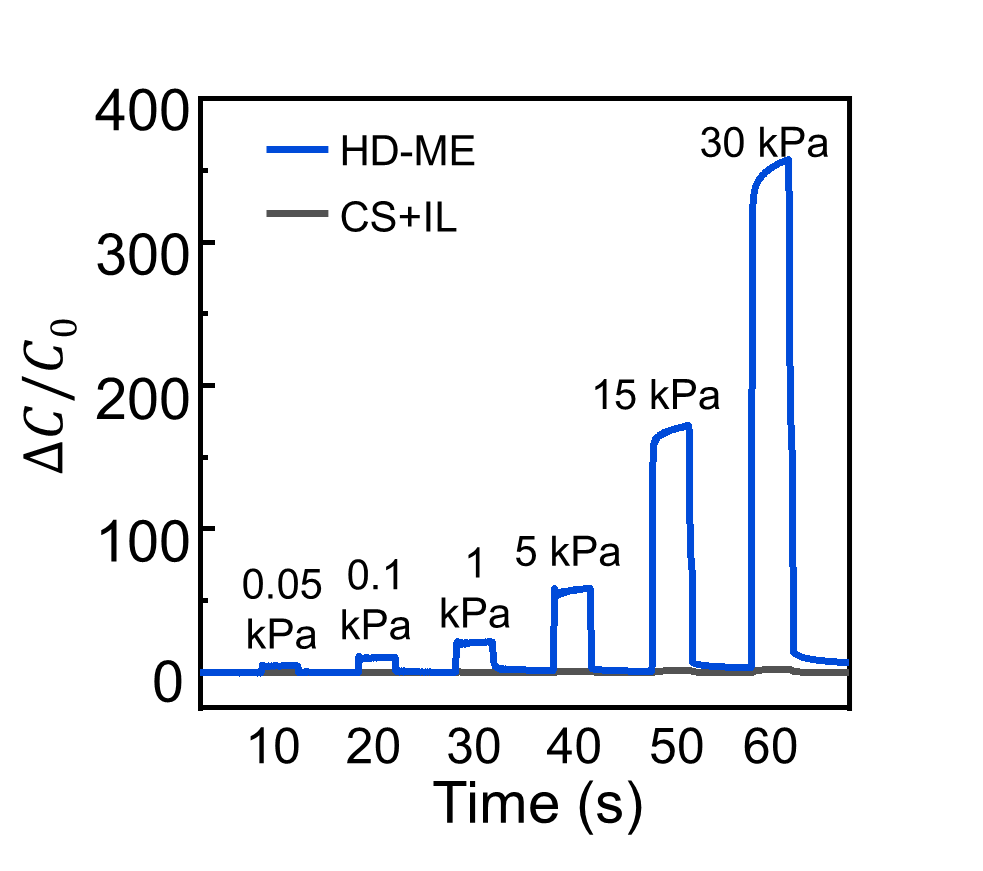


**Supplementary Fig. 15 | Performance of pressure sensor based ion gels.** Plots of relative change in capacitance as a function of applied pressures (0.05kPa, 0.1kPa, 1kPa, 5kPa, 15kPa, and 30kPa) comparison between HD-ME and CS+IL iongel.


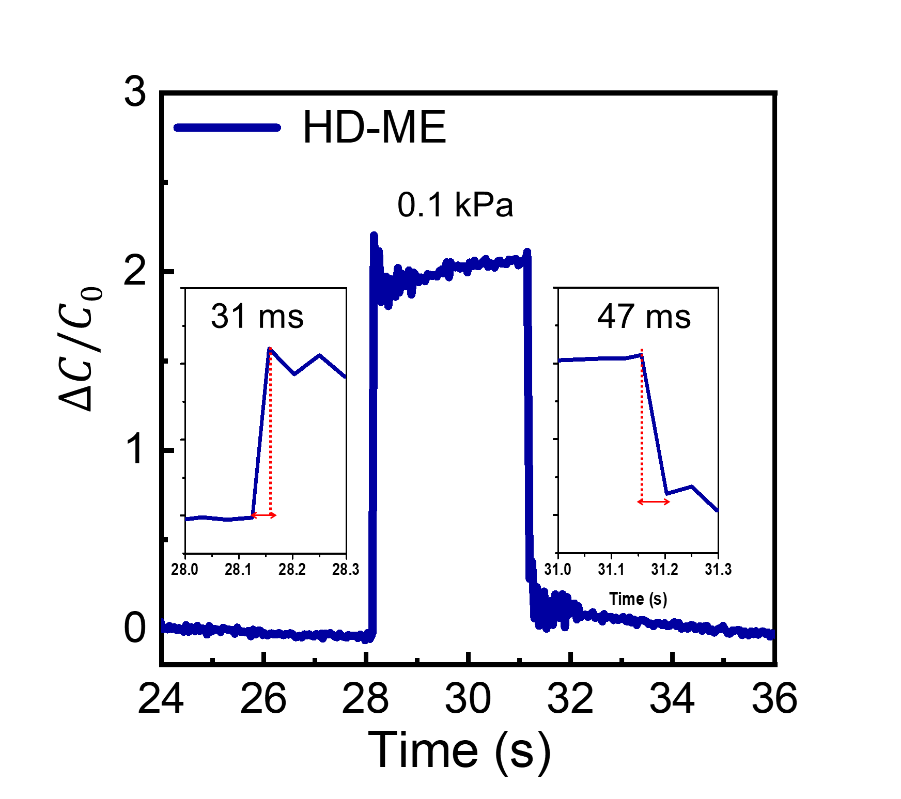


**Supplementary Fig. 16 | Dynamic response of HD-ME ion gel based ionic capacitive pressure sensor.** Transient response of HD-ME ion gel based ionic capacitive pressure sensor under 0.1 kPa. The inset shows a magnified curve representing a response time of 31 ms and a reset time of 47 ms, applied bias at 1V at 100 kHz.


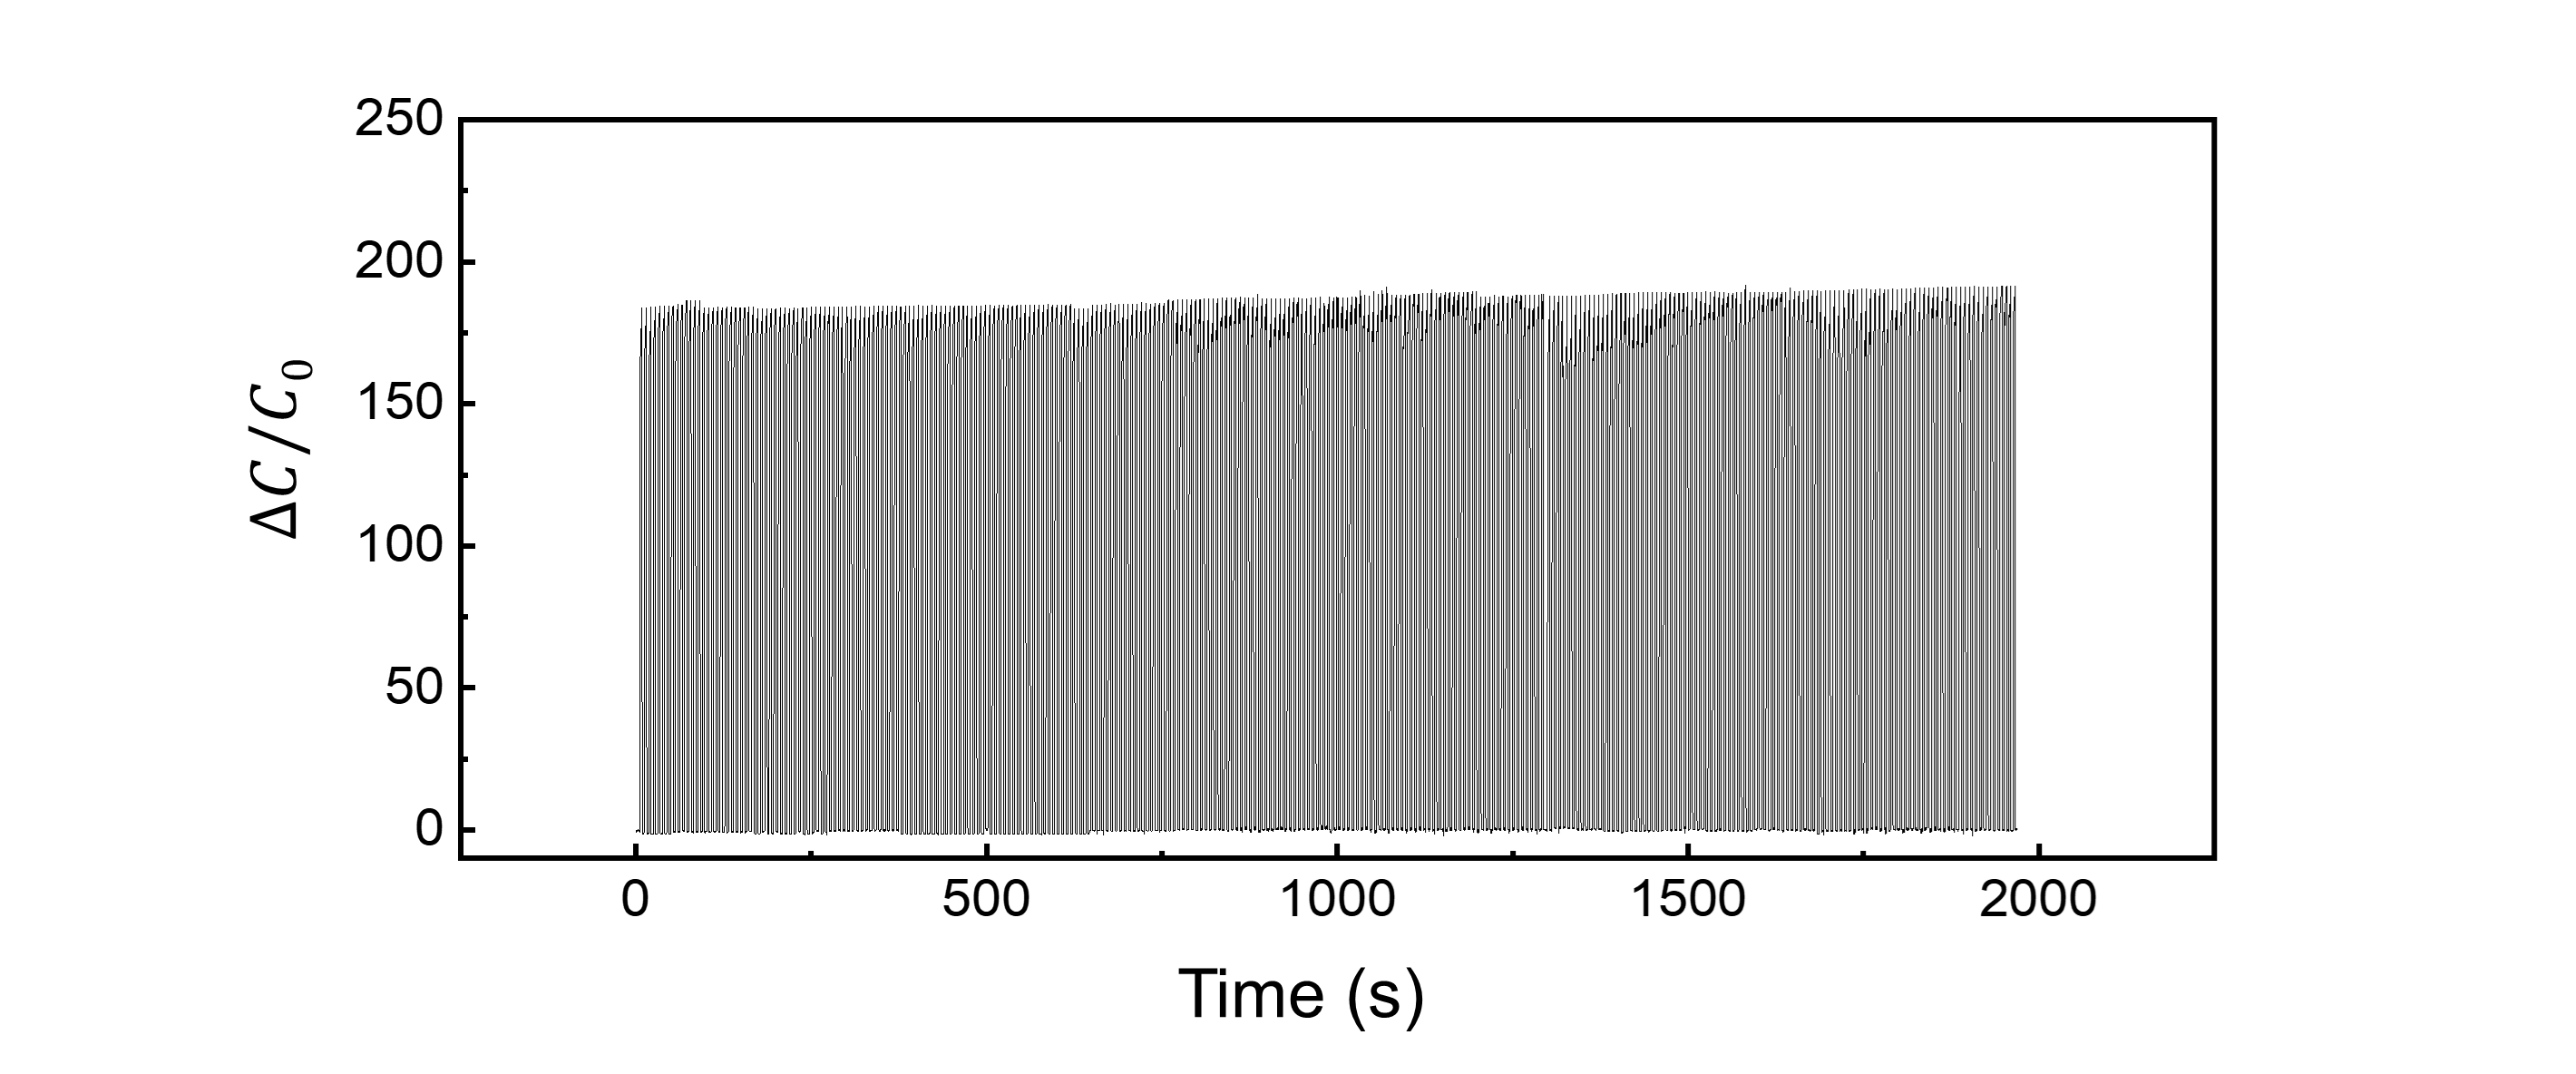


**Supplementary Fig. 17 | Reliability of HD-ME ion gel based ionic capacitive pressure sensor.** Mechanical durability test results of the HD-ME ion gel based sensor (700 cycles) applied bias at 1V at 100 kHz.


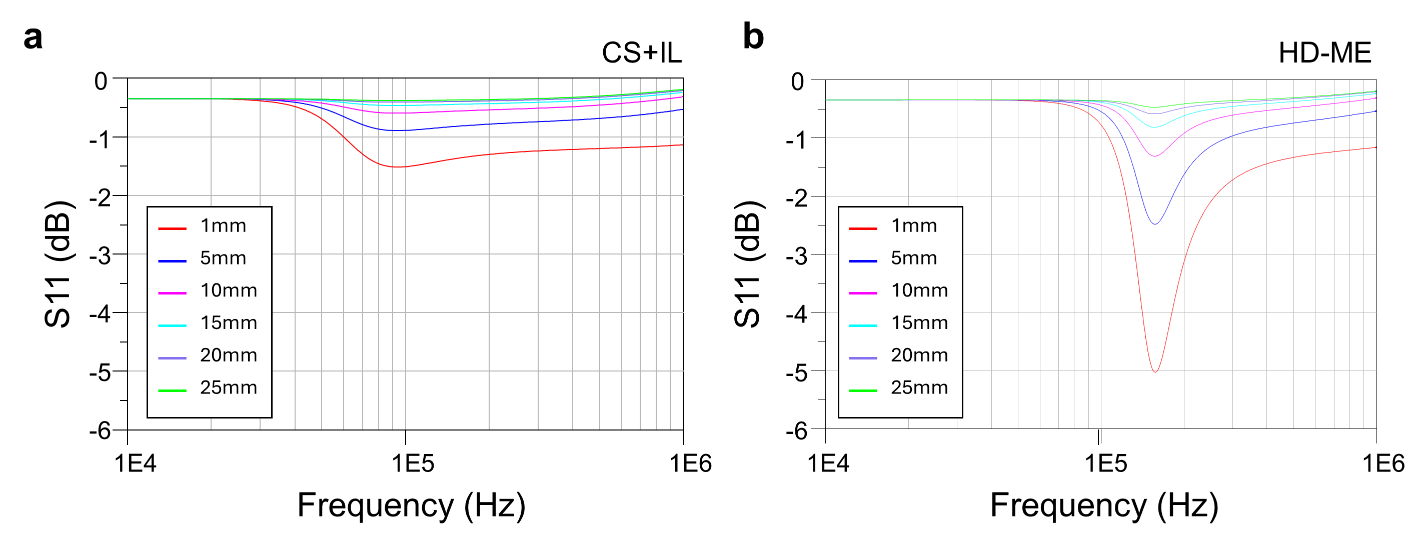


**Supplementary Fig. 18 |** Simulation results of sensitivityaccording to the air gap between the sensor coil and the reader coil (**a**) CS+IL ion gel, (**b**) HE-ME ion gel.


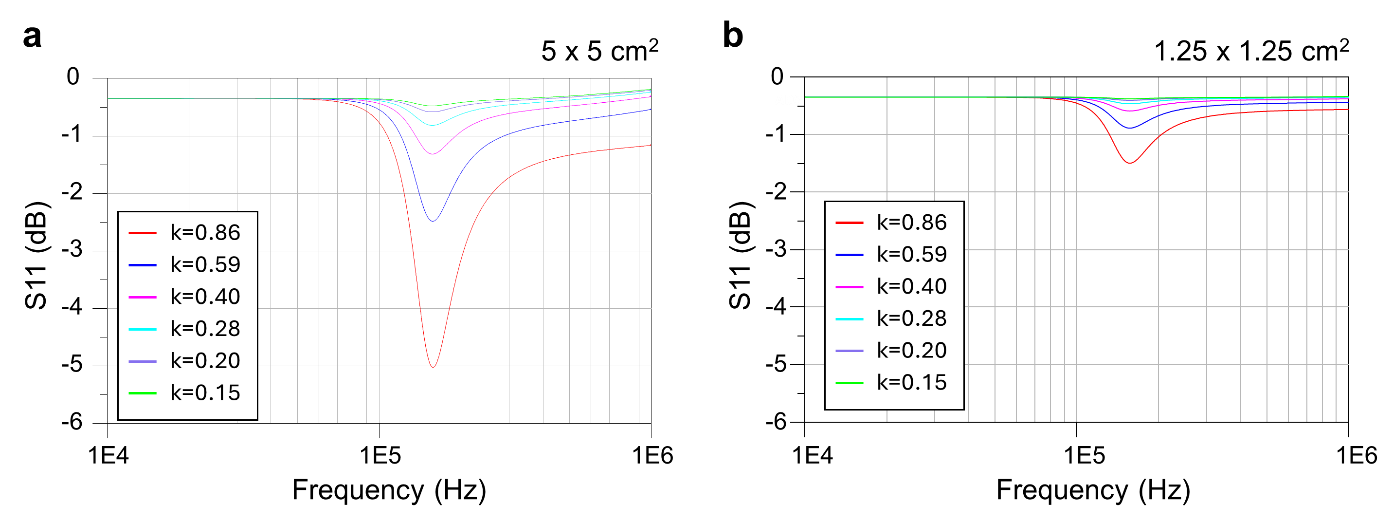


**Supplementary Fig. 19 |** Comparison of measurement sensitivity based on antenna size (**a**) 5 x 5 cm2 and (**b**) 1.25 x 1.25 cm2.


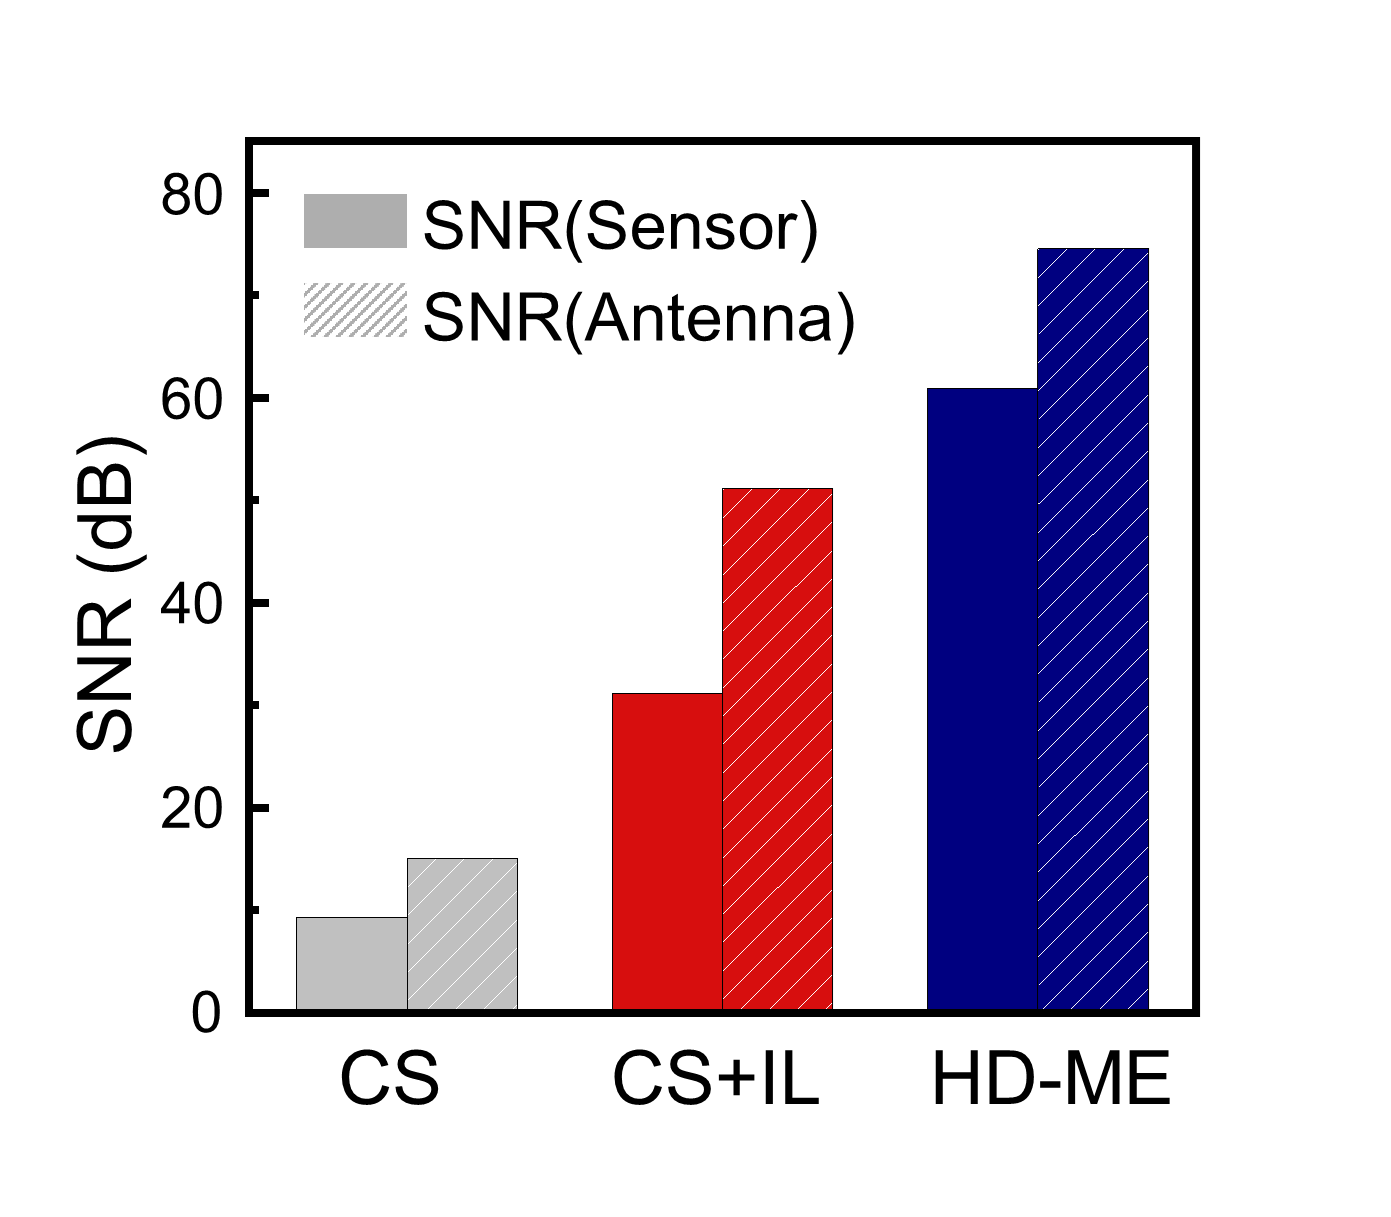


**Supplementary Fig. 20 |** Signal to noise ration of WiLECS platform with various materials.

Supplementary Tables

**Supplementary Table. 1 |** Quantitative comparison of reported wireless pressure sensors, summarizing their sensitivity and operating frequency ranges.


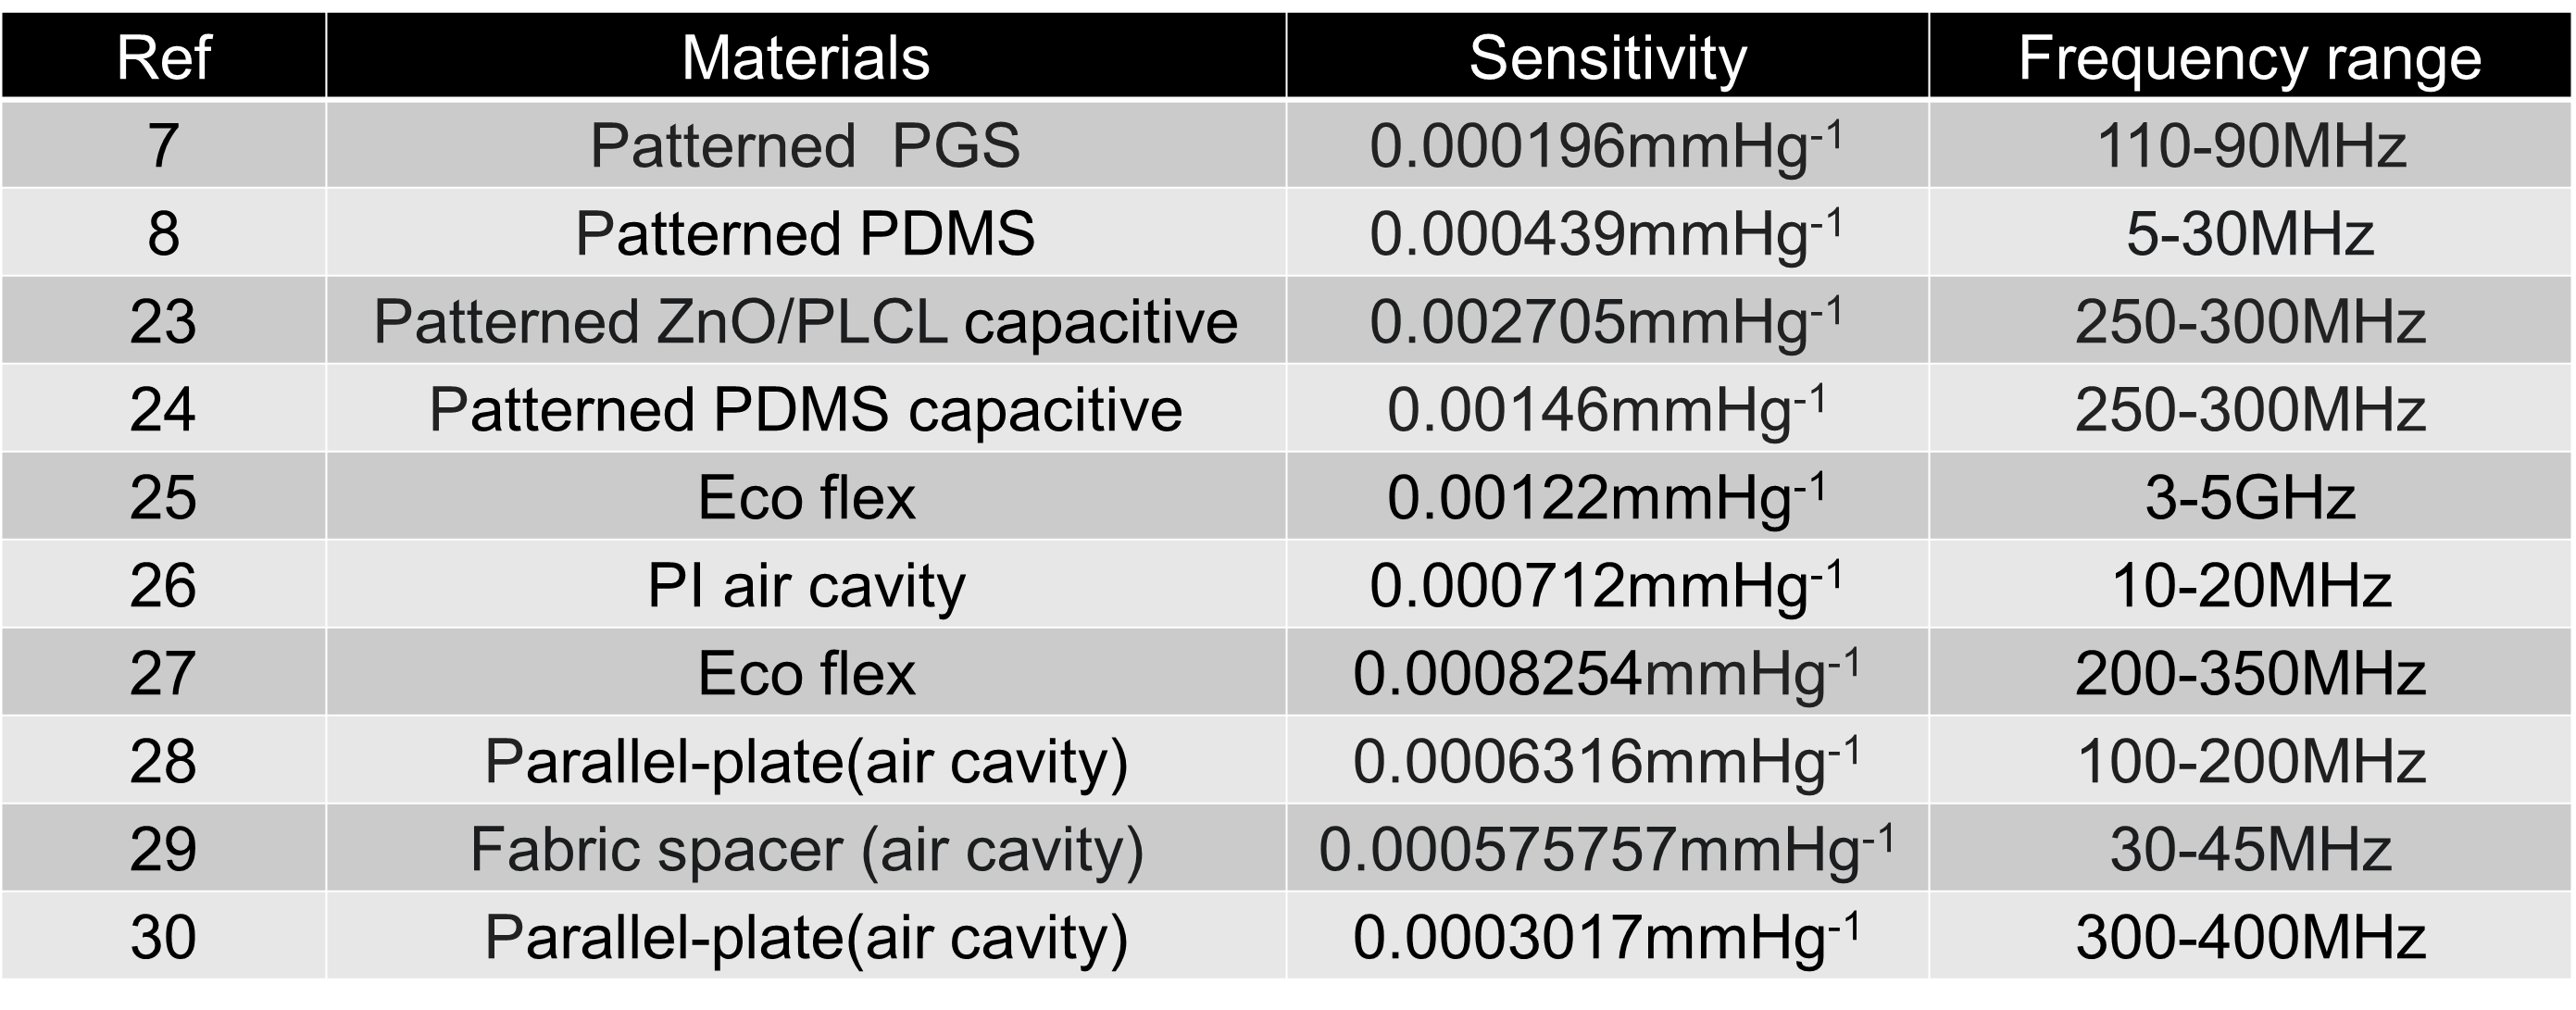


**Supplementary Table. 2 |** Simulation results of sensitivity according to the air gap between the sensor coil and the reader coil.


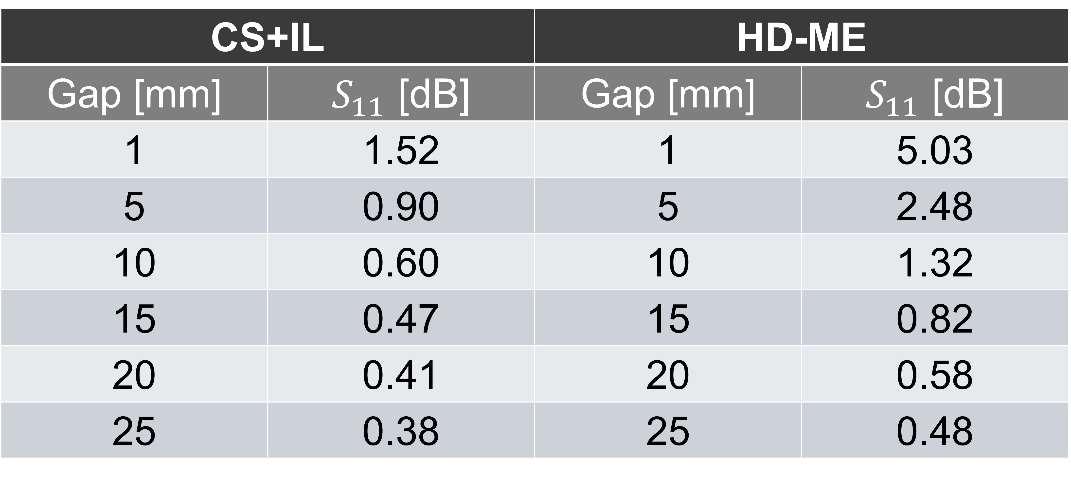


**Supplementary Table. 3 |** Comparison of measurement sensitivity based on antenna size.


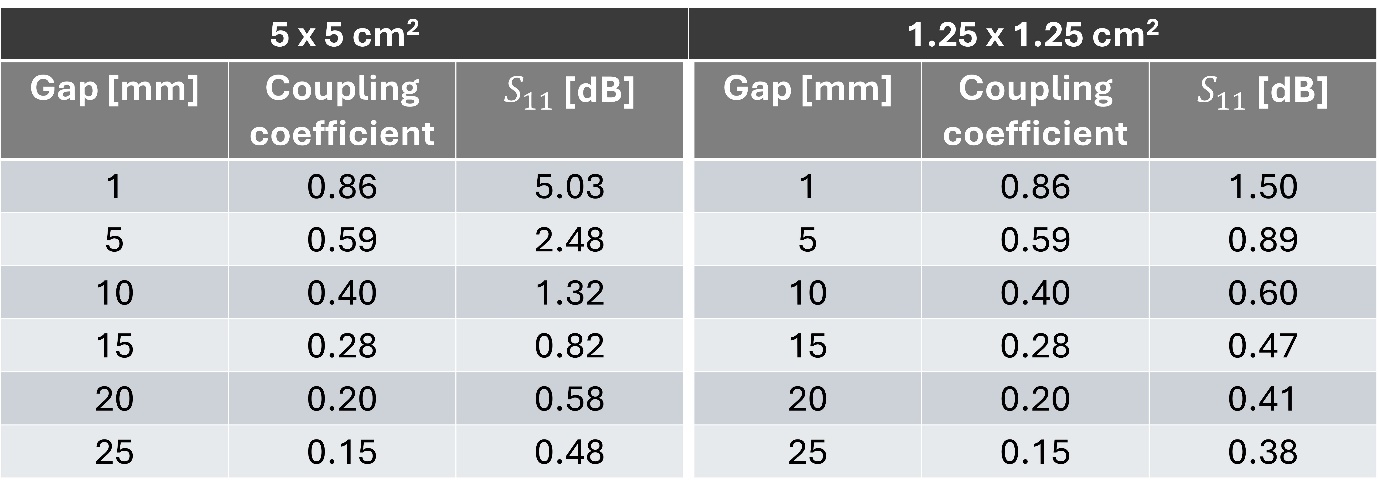

Supplement: Supplementary file 1 [file 3fe364b8ce105e194f970b2e.docx]
